# Supplementary material
Source: publisher figshare collection journal article supplement (https://tandf.figshare.com/ndownloader/files/17938424)
Supplement: Supplementary file 1 [file 17938424]

Annex I

*Analysis of the correlation between PM10, NO2 and SO2*

Figure A.1 - Correlation between annual average concentration of PM10 and NO2 (2015-2017), µg m-3

Figure A.2 - Correlation between annual average concentration of PM10 and SO2 (2015-2017), µg m-3

Figure A.3 - Correlation between annual average concentration of NO2 and SO2 (2015-2017), µg m-3
